# Supplementary material
Source: Elsevier journal article supplement (https://www.sciencedirect.com/science/article/pii/S1885585714003235)
Supplement: mmc1 [file S1885585714003235:mmc1.pdf]

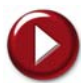

## Supplementary material

---

# Blood PGC-1 $\alpha$ Concentration Predicts Myocardial Salvage and Ventricular Remodeling After ST-segment Elevation Acute Myocardial Infarction

Óscar Fabregat-Andrés,<sup>a,b,\*</sup> Francisco Ridocci-Soriano,<sup>a,c</sup> Jordi Estornell-Erill,<sup>d</sup>  
Miguel Corbí-Pascual,<sup>e</sup> Alfonso Valle-Muñoz,<sup>f</sup> Alberto Berenguer-Jofresa,<sup>a</sup>  
José Antonio Barrabés,<sup>g,h</sup>, Manuel Mata<sup>b</sup> and María Monsalve<sup>i</sup>

<sup>a</sup>*Servicio de Cardiología, Consorcio Hospital General Universitario de Valencia, Valencia, Spain*

<sup>b</sup>*Fundación de Investigación, Hospital General de Valencia, Valencia, Spain*

<sup>c</sup>*Departamento de Medicina, Universitat de València, Valencia, Spain*

<sup>d</sup>*Unidad de Imagen Cardíaca, ERESA, Hospital General Universitario de Valencia, Valencia, Spain*

<sup>e</sup>*Departamento de Cardiología, Complejo Hospitalario de Albacete, Albacete, Spain*

<sup>f</sup>*Departamento de Cardiología, Hospital Marina Salud, Denia, Alicante, Spain*

<sup>g</sup>*Departamento de Cardiología, Hospital Universitario Vall d'Hebron, Barcelona, Spain*

<sup>h</sup>*Departamento de Medicina, Universitat Autònoma de Barcelona, Barcelona, Spain*

<sup>i</sup>*Departamento de Metabolismo Molecular, Instituto de Investigaciones Biomédicas Alberto Sols (CSIC), Madrid, Spain*

---

## MÉTODOS

### Criterios de exclusión

Los criterios de exclusión fueron: antecedentes de cardiopatía isquémica documentada, con el fin de evitar sesgos en la determinación de la extensión de la necrosis miocárdica en los estudios de resonancia magnética cardíaca; estenosis significativa de cualquier arteria principal excepto la causal del infarto en el estudio angiográfico; evolución del infarto agudo de miocardio sin elevación del segmento ST > 150 min desde el inicio del dolor o síntomas de sospecha y la extracción de la primera muestra sanguínea para el análisis molecular, para evitar que los procesos moleculares de transcripción de ARN y síntesis proteica interfirieran en la estimación de la expresión basal de las diferentes dianas génicas en el sujeto de estudio, y/o, finalmente, negativa del paciente a participar en el estudio. Asimismo se excluyó a los pacientes con reinfarcto en las primeras 72 h, contraindicación para el estudio de cardiioresonancia magnética o negativa del paciente.

### Recogida de datos

Durante el ingreso se recogieron los siguientes datos: historia clínica del paciente con todos los factores de riesgo cardiovascular; valores analíticos que incluyeron glucosa en ayunas, hemoglobina al ingreso, fórmula leucocitaria en urgencias y a las 72 h (leucocitos, linfocitos y monocitos), proteína C reactiva en urgencias, creatinina al ingreso, perfil lipídico y glucohemoglobina (HbA<sub>1c</sub>) y marcadores de daño miocárdico (curva seriada cada 6 h, utilizando valores máximos para el análisis) como troponina I (TnI), creatincinasa (CK) y su fracción MB masa (CK-MB), determinados mediante inmunoanálisis en el analizador UniCel<sup>®</sup> DxI 800 con kits Access AccuTnI<sup>®</sup>, Synchron LX-20<sup>®</sup> y Access CK-MB<sup>®</sup> respectivamente (Beckman Coulter Inc.), y datos ecocardiográficos recogidos indistintamente por dos cardiólogos acreditados y experimentados en la técnica: estudio en modo M y 2D (diámetros y volúmenes de ventrículo izquierdo) y cálculo de la fracción de eyección del ventrículo izquierdo estimada por la fórmula de Simpson y expresada en porcentaje. Se utilizaron los equipos Philips i33<sup>®</sup> y Philips Sonos 7500<sup>®</sup> (Philips Healthcare; Estados Unidos).

### Estudios de cardiioresonancia magnética

Los estudios se llevaron a cabo con una unidad de 1,5 T (Magnetom Sonata, Siemens; Erlangen, Alemania). Las imágenes funcionales de eje largo y eje corto se obtuvieron utilizando secuencias acopladas a ECG *Steady State Free Precession* (SSFP), de 8 mm de grosor por corte, con 2 mm de

distancia entre ellos. Se calculó el volumen telediastólico del ventrículo izquierdo indexado (VTDVIi) mediante el trazado manual del endocardio en cortes sucesivos en eje corto. Con base en estudios ecocardiográficos<sup>1</sup>, se definió remodelado ventricular como el incremento del VTDVIi > 10% en el estudio de control a los 6 meses.

Se utilizó un modelo estándar de 17 segmentos cardíacos para la valoración de la perfusión miocárdica y la determinación de las áreas de edema y realce tardío de gadolinio<sup>2</sup>.

Los defectos de perfusión se establecieron visualmente siguiendo este modelo basado en déficit persistentes durante el primer paso de contraste. Las áreas de alta señal en T2 se identificaron por inspección visual.

La detección de edema miocárdico, como aproximación al área miocárdica en riesgo, se realizó a través de cortes en eje corto en T2 siguiendo las mismas secuencias utilizadas en cine, mediante cortes multisección en HASTE (*Half-Fourier Acquisition Single-shot Turbo spin Echo*).

Las imágenes de realce tardío de gadolinio para estimar el área necrótica se captaron tras administración intravenosa de gadobenato dimeglubina 0,5 molar a 0,15 ml/kg. Las áreas con realce tardío de gadolinio se identificaron por inspección visual. Se utilizaron secuencias precoces, en apnea en eje corto sincronizadas con el ECG, de disparo único *Inversion Recovery-SSFP* (IR-SSFP), usando tiempo de inversión (IT) prolongado, para diferenciar miocardio normal, miocardio necrótico y obstrucción microvascular. Tras 10 min, se repitieron las mismas secuencias en eje corto ajustando el IT al miocardio normal y secuencias segmentadas turbo-FLASH (*Fast Low Angle Shot*) 2D y 3D en apnea.

Las áreas de obstrucción microvascular se definieron como áreas hipointensas en las secuencias precoces de supresión miocárdica y con captación periférica de contraste en las secuencias tardías (*doughnut-like*).

Dado que no se dispone de *software* de cálculo automático, las áreas de edema miocárdico, realce tardío de gadolinio y obstrucción microvascular las midió, mediante trazo manual en una estación de trabajo específica (Argus, Siemens; Erlangen, Alemania), un investigador experimentado que no tenía información sobre otros datos del estudio y expresó los resultados en porcentaje relativo a la masa miocárdica total, estimada previamente por trazo manual endocárdico y epicárdico.

### **Preparación de las muestras: extracción de ARN y análisis de proteínas**

Los aislados celulares resultantes tras centrifugación se procesaron utilizando citocentrifugación y tinción rápida panóptica (Panreac). Solo se utilizaron para el análisis los preparados con más del 90% de células mononucleares.

El ARN total se aisló mediante Trizol™ (Invitrogen) siguiendo las instrucciones del fabricante. Se analizó la calidad del ARN mediante Bioanalyzer y se cuantificó en un Nanodrop. Se utilizó para los análisis ARN con una tasa de absorbancia entre 260 y 280  $\geq 1,8$  y un número de integridad de ARN (RIN)  $\geq 8$ .

La concentración de proteína de PGC-1 $\alpha$  se cuantificó por medio de *microarrays* específicos (análisis por Zeptosens).

## RESULTADOS

### Respuesta inmunitaria y PGC-1 $\alpha$

Con el fin de evaluar si la inducción de PGC-1 $\alpha$  forma parte de la respuesta inflamatoria desencadenada tras el infarto agudo de miocardio con elevación del segmento ST, se monitorizaron los valores absolutos y relativos de leucocitos, linfocitos y monocitos al ingreso y a las 72 h. Se corroboró la existencia de leucocitosis ligera al ingreso en ambos grupos, con normalización de las cifras a las 72 h, como parte de la respuesta inmunitaria aguda inespecífica producida por el infarto agudo de miocardio con elevación del segmento ST. El grupo de pacientes con inducción de PGC-1 $\alpha$  presentó al ingreso cifras significativamente menores en el recuento absoluto y relativo tanto de linfocitos como de monocitos. Sin embargo, en el control analítico a las 72 h, se pudo observar un mayor incremento porcentual en sus cifras (tabla del material suplementario).

### Actividad molecular de PGC-1 $\alpha$

Con el objetivo de monitorizar la actividad molecular de PGC-1 $\alpha$  y comprobar si la inducción tras infarto agudo de miocardio con elevación del segmento ST conlleva un incremento en su control transcripcional, se determinó el grado de expresión en forma de ARN de distintas dianas génicas de PGC-1 $\alpha$ : citC, MnSOD y GPx. Se encontró un incremento de citC y GPx a las 72 h en el grupo de inducción de PGC-1 $\alpha$  (13,6 frente a 1,07;  $p = 0,001$  y 425,6 frente a 3,08;  $p = 0,046$  respectivamente), que no fue significativo en el caso de MnSOD (figura de material suplementario).

Asimismo, para confirmar la significación funcional de estos hallazgos, se determinó la concentración proteica de la PGC-1 $\alpha$ , y se observó una correlación positiva con la cantidad de ARN (incremento relativo de la expresión proteica a las 72 h estimado por Zeptosens,  $6,34 \pm 2,6$  en el grupo con inducción de PGC-1 $\alpha$  frente a  $1,7 \pm 0,8$  en el grupo sin inducción;  $p = 0,04$ ).

## DISCUSIÓN

### Respuesta inflamatoria en pacientes con inducción de PGC-1 $\alpha$

Los pacientes con inducción de PGC-1 $\alpha$  presentaron cifras menores en valores absolutos y relativos tanto de linfocitos como monocitos en el momento del ingreso, aunque después sufrieron un mayor incremento relativo de sus cifras a las 72 h. Si bien varios trabajos han descrito la linfocitopenia durante el infarto o la monocitosis reactiva como marcadores pronósticos cardiovasculares<sup>3-5</sup>, serían necesarios más estudios para establecer la posible relación entre esas variables.

## BIBLIOGRAFÍA

1. Nucifora G, Marsan NA, Bertini M, Delgado V, Siebelink HM, Van Werkhoven JM, et al. Reduced left ventricular torsion early after myocardial infarction is related to left ventricular remodeling. *Circ Cardiovasc Imaging*. 2010;3:433-42.
2. Cerqueira MD, Weissman NJ, Dilsizian V, Jacobs AK, Kaul S, Laskey WK, et al. Standardized myocardial segmentation and nomenclature for tomographic imaging of the heart. A statement for healthcare professionals from the Cardiac Imaging Committee of the Council on Clinical Cardiology of the American Heart Association. *Int J Cardiovasc Imaging*. 2002;18:539-42.
3. Núñez J, Sanchis J, Bodí V, Núñez E, Mainar L, Heatta AM, et al. Relationship between low lymphocyte count and major cardiac events in patients with acute chest pain, a non-diagnostic electrocardiogram and normal troponin levels. *Atherosclerosis*. 2009;206:251-7.
4. Bodí V, Sanchis J, Núñez J, Rumiz E, Mainar L, López-Lereu MP, et al. Linfopenia post-reperfusión y obstrucción microvascular en el infarto agudo de miocardio con elevación del segmento ST. *Rev Esp Cardiol*. 2009;62:1109-17.
5. Maekawa Y, Anzai T, Yoshikawa T, Asakura Y, Takahashi T, Ishikawa S, et al. Prognostic significance of peripheral monocytosis after reperfused acute myocardial infarction: a possible role for left ventricular remodeling. *J Am Coll Cardiol*. 2002;39:241-6.

**Tabla material suplementario**

Subtipos celulares de leucocitos según inducción de PGC-1 $\alpha$  tras infarto agudo de miocardio con elevación del segmento ST: muestra sanguínea al ingreso y a las 72 h

| Leucocitos, subtipos celulares                       | Inducción PGC-1 $\alpha$ (n = 8) | Sin inducción (n = 23) | p       |
|------------------------------------------------------|----------------------------------|------------------------|---------|
| Leucocitos totales 0 h ( $\times 1.000/\text{ml}$ )  | 10.787 $\pm$ 1.336               | 11.830 $\pm$ 558       | 0,497   |
| Leucocitos totales 72 h ( $\times 1.000/\text{ml}$ ) | 7.150 $\pm$ 657                  | 8.256 $\pm$ 443        | 0,185   |
| Linfocitos 0 h ( $\times 1.000/\text{ml}$ )          | 1.437 $\pm$ 244                  | 2.443 $\pm$ 1.370      | 0,013   |
| Linfocitos 72 h ( $\times 1.000/\text{ml}$ )         | 1.800 $\pm$ 162                  | 2.126 $\pm$ 129        | 0,135   |
| Monocitos 0 h ( $\times 1.000/\text{ml}$ )           | 475 $\pm$ 61                     | 823 $\pm$ 44           | < 0,001 |
| Monocitos 72 h ( $\times 1.000/\text{ml}$ )          | 612 $\pm$ 74                     | 856 $\pm$ 63           | 0,023   |
| Linfocitos 0 h (%)                                   | 15,15 $\pm$ 3,1                  | 21,35 $\pm$ 2,3        | 0,132   |
| Linfocitos 72 h (%)                                  | 25,47 $\pm$ 2,3                  | 26,33 $\pm$ 1,4        | 0,756   |
| Variación porcentual linfocitos (%)                  | 46,86 $\pm$ 25,7                 | 7,11 $\pm$ 11,2        | 0,187   |
| Monocitos 0 h (%)                                    | 4,60 $\pm$ 0,6                   | 7,38 $\pm$ 0,4         | 0,002   |
| Monocitos 72 h (%)                                   | 8,32 $\pm$ 0,8                   | 10,23 $\pm$ 0,3        | 0,050   |
| Variación porcentual monocitos (%)                   | 38,27 $\pm$ 18,8                 | 7,77 $\pm$ 7,8         | 0,168   |



**Figura material suplementario.** Expresión proteica de diferentes dianas moleculares de PGC-1 $\alpha$ : citocromo C (citC), glutatión peroxidasa (GPx) y manganeso superóxido dismutasa (MnSOD). Análisis por *microarrays* de proteínas mediante tecnología Zeptosens.

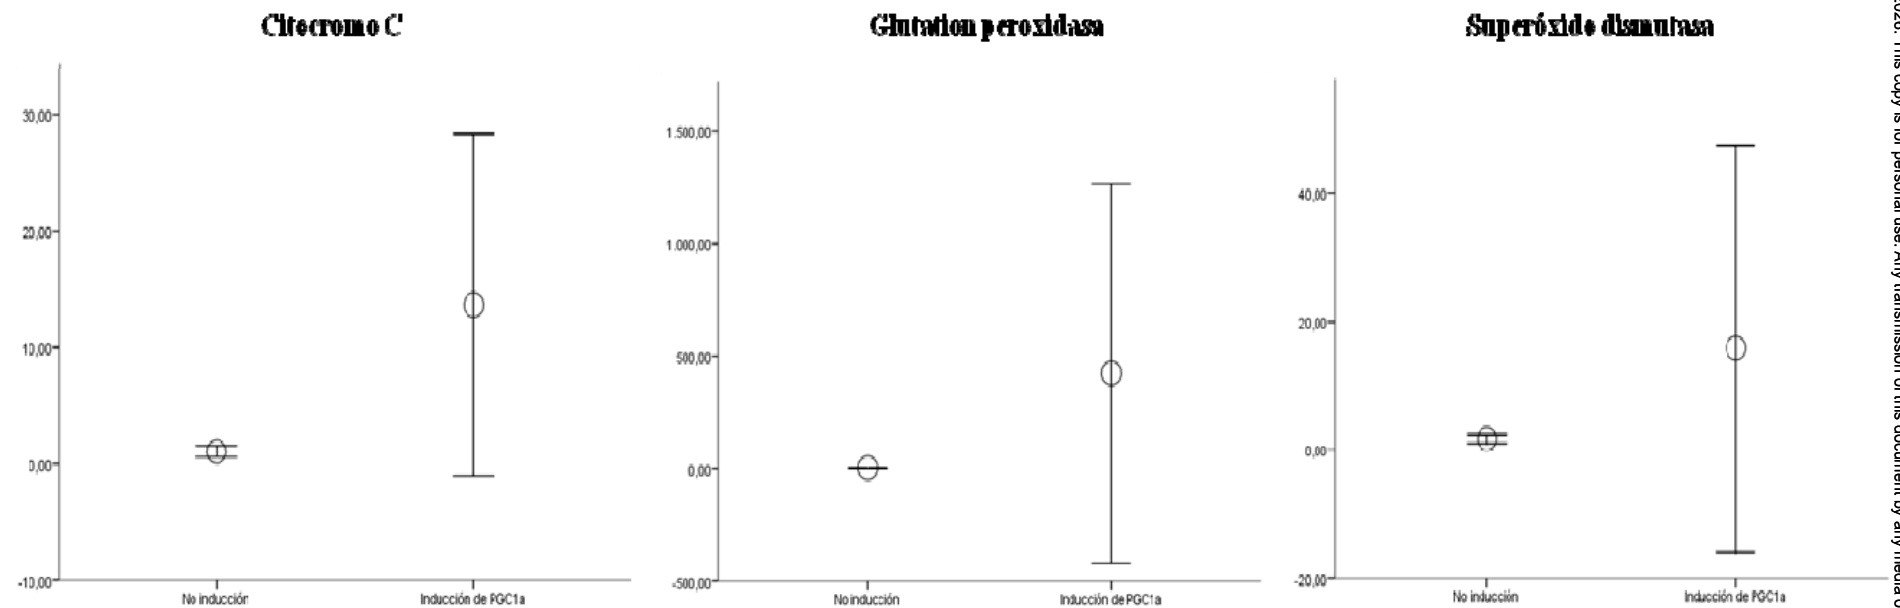

|                                        | Grupo inducido PGC-1 $\alpha$ (n=6) | Grupo no inducido PGC-1 $\alpha$ (n=23) | p value |
|----------------------------------------|-------------------------------------|-----------------------------------------|---------|
| Citocromo C (citC)                     | 13.69 ( $\pm$ 6.72)                 | 1.07 ( $\pm$ 0.24)                      | 0.001   |
| Glutathion peroxidasa (GPx)            | 425.65 ( $\pm$ 315.81)              | 1.08 ( $\pm$ 0.83)                      | 0.046   |
| Manganeso superóxido dismutasa (MnSOD) | 15.78 ( $\pm$ 11.38)                | 1.76 ( $\pm$ 0.33)                      | 0.077   |
